# Supplementary material for: Plants on Rich-Magnesium Dolomite Barrens: A Global Phenomenon
Source: MDPI journal article supplement (doi:10.3390/biology10010038), 2021-01-08
Supplement: s1 [file s1]

**Table S1.** Population genetic parameters estimated for dolomite and reference flora. Abbreviations:  $H_s$  = mean within-population gene diversity. Dif. = population differentiation, the following indicators apply: † =  $G_{st}$  or ‡ =  $F_{st}$ ; among-population variance from AMOVA)

| Citation | Taxon                                       | Data Type  | $H_s$       | Dif. ( $F_{ST}$ or $G_{ST}$ ) |
|----------|---------------------------------------------|------------|-------------|-------------------------------|
| [68]     | <i>Jurinea pinnata</i>                      | AFLP       | 0.135-0.198 | 0.37‡                         |
| [127]    | <i>Convolvulus boissieri</i>                | AFLP       | 0.033-0.127 | 0.395‡                        |
| [124]    | <i>Viola cazortensis</i>                    | ISSR       | 0.215       | 0.104‡                        |
| [125]    | <i>Helianthemum apeninum subsp. estevei</i> | SSR        | 0.47        |                               |
| [125]    | <i>Helianthemum panosum</i>                 | SSR        | 0.593       |                               |
| [129]    | <i>Erigeron parishii</i>                    | Alloenzyme | 0.16        | 0.12†                         |
| [130]    | <i>Eriogonium ovalifolium var. vineum</i>   | Alloenzyme | 0.19        | 0.07†                         |
| [131]    | <i>Astragalus albens</i>                    | Alloenzyme | 0.139       | 0.01†                         |
| [92]     | Gypsum plants                               |            | 0.196       | 0.423†, 0.466‡                |
| [117]    | Rare                                        |            |             | 0.212                         |
|          | Common                                      |            |             | 0.198                         |
